6. Ford PN, Hamer C, Medakkar S: Use of the Airtraq in the difficult airway. *Eur J Anaesthesiol* 2007; 24:730-1
7. Dhonneur G, Ndoko S, Amathieu R, Housseini LE, Poncelet C, Tual L: Tracheal intubation using the Airtraq in morbid obese patients undergoing emergency cesarean delivery. *ANESTHESIOLOGY* 2007; 106:629-30
8. Dhonneur G, Ndoko S, Amathieu R, Attias A, Housseini L, Polliand C, Tual L: A comparison of two techniques for inserting the Airtraq laryngoscope in morbidly obese patients. *Anaesthesia* 2007; 62:774-7
9. Ndoko SK, Amathieu R, Tual L, Polliand C, Kamoun W, El Housseini L, Champault G, Dhonneur G: Tracheal intubation of morbidly obese patients: A randomized trial comparing performance of Macintosh and Airtraq laryngoscopes. *Br J Anaesth* 2008; 100:263-8
10. Black JJ: Emergency use of the Airtraq laryngoscope in traumatic asphyxia: Case report. *Emerg Med J* 2007; 24:509-10
11. Maharaj CH, Costello JF, McDonnell JG, Harte BH, Laffey JG: The Airtraq as a rescue airway device following failed direct laryngoscopy: A case series. *Anaesthesia* 2007; 62:598-601
12. Suzuki A, Toyama Y, Iwasaki H, Henderson J: Airtraq for awake tracheal intubation. *Anaesthesia* 2007; 62:746-7
13. Uakritdathikam T, Asampinawat T, Wanasuwannakul T, Yoosamran B: Awake intubation with Airtraq laryngoscope in a morbidly obese patient. *J Med Assoc Thai* 2008; 91:564-7
14. Cohen J: Differences between proportions, Statistical Power Analysis for the Behavioral Sciences, 2nd edition. Hillsdale, New Jersey: Lawrence Erlbaum Associates, 1988, pp 179-214
15. Hirabayashi Y, Otsuka Y, Taira K, Shinohara T, Kikuchi Y, Shimada N, Kono R, Tamai K, Inoue S, Seo N: Airtraq optical laryngoscope. *Masui* 2008; 57:1026-30
16. Hirabayashi Y, Seo N: The Airtraq laryngoscope for placement of double-lumen endobronchial tube. *Can J Anaesth* 2007; 54:955-7

## ANESTHESIOLOGY REFLECTIONS

### Noel Gillespie's Diaries

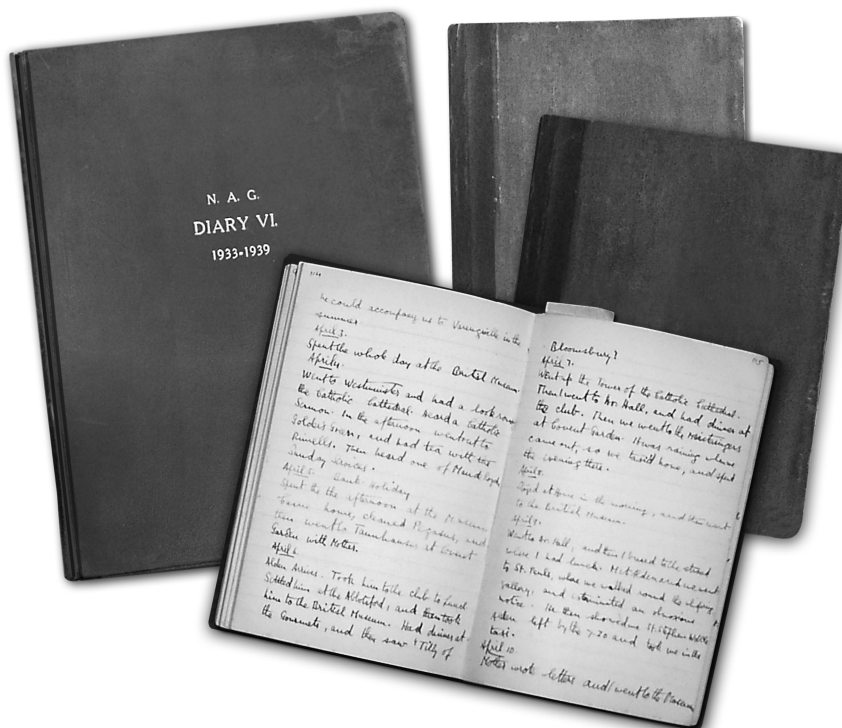

Born Christmas Day of 1904 in Sydenham, England, Noel A. Rieder would change his name as a teenager to Noel A. Gillespie (1904-1955). Successfully advised by T. E. Lawrence, the future "Lawrence of Arabia," young Noel matriculated at Oxford. Gillespie interrupted his studies to steam aboard the S.S. *Orestes* as "professor of English" to Albert Schweitzer on the medical missionary's return trip to Africa. Gillespie resumed studies at Oxford, where he earned five academic degrees and then his Diploma in Anaesthetics. In 1939 he forsook England for the University of Wisconsin, where, under the watchful eye of Professor Ralph Waters, Gillespie finished an anesthesia residency, earned a second medical doctorate, and authored his text *Endotracheal Anaesthesia*. Fifty years after his sudden death in 1955, Gillespie's handwritten diaries (from 1917-1933) were curatorially purchased at auction. (Copyright © the American Society of Anesthesiologists, Inc. This image appears in color in the *Anesthesiology Reflections* online collection available at [www.anesthesiology.org](http://www.anesthesiology.org).)

George S. Bause, M.D., M.P.H., Honorary Curator, ASA's Wood Library-Museum of Anesthesiology, Park Ridge, Illinois, and Clinical Associate Professor, Case Western Reserve University, Cleveland, Ohio. [UJYC@aol.com](mailto:UJYC@aol.com).
